# Supplementary material
Source: PubMed Central journal article supplement (PMC5600185)
Supplement: nl7b01718_si_001.pdf [file nl7b01718_si_001.pdf]

**The Smallest Archimedean Screw:  
Facet Dynamics and Friction in Multi-Walled Nanotubes**

Roberto Guerra,<sup>1,2</sup> Itai Leven,<sup>3</sup> Andrea Vanossi,<sup>4,2</sup> Oded Hod,<sup>3</sup> and Erio Tosatti<sup>2,4,5</sup>

<sup>1</sup>*Center for Complexity and Biosystems, Department of Physics, University of Milan, 20133 Milan, Italy*

<sup>2</sup>*International School for Advanced Studies (SISSA), Via Bonomea 265, 34136 Trieste, Italy*

<sup>3</sup>*Department of Physical Chemistry, School of Chemistry,*

*The Raymond and Beverly Sackler Faculty of Exact Sciences and The Sackler Center for  
Computational Molecular and Materials Science, Tel Aviv University, Tel Aviv 6997801, Israel*

<sup>4</sup>*CNR-IOM Democritos National Simulation Center, Via Bonomea 265, 34136 Trieste, Italy*

<sup>5</sup>*The Abdus Salam International Centre for Theoretical Physics (ICTP), Strada Costiera 11, 34151 Trieste, Italy*

# PES OF CARBON-BASED SYSTEMS

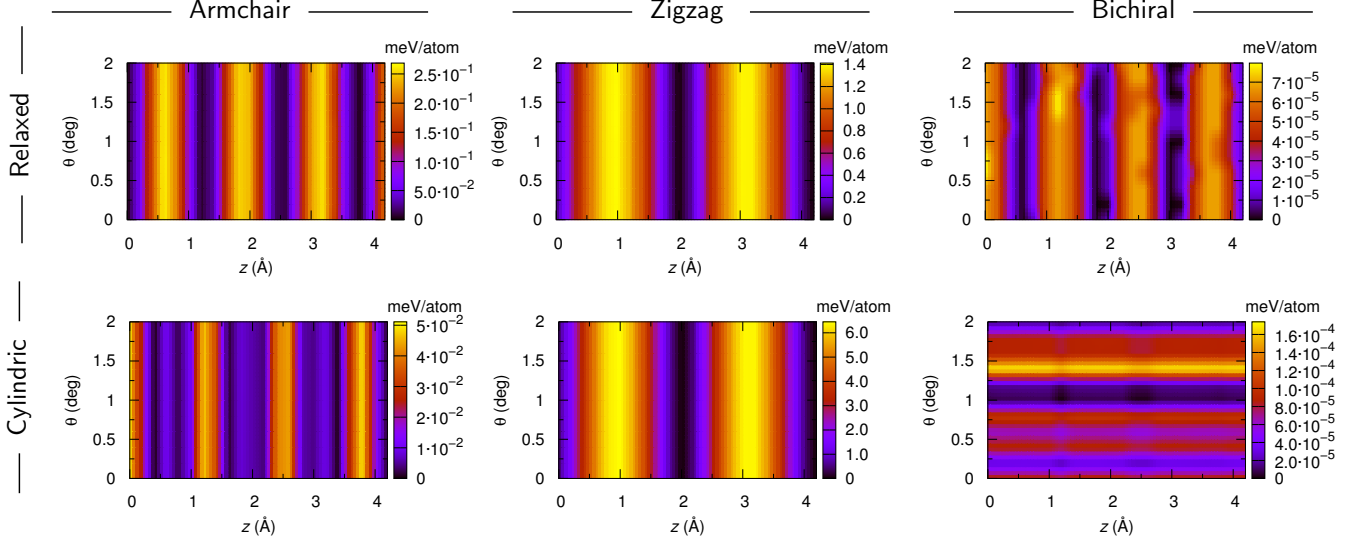

**FIGURE S1:** PES maps (Carbon) – Potential energy surface maps of the considered armchair (left column), zigzag (center column), and bi-chiral (right column) DWCNTs for relaxed (top panels) and cylindric (bottom panels) configuration.

## FITTING STATIC FRICTION

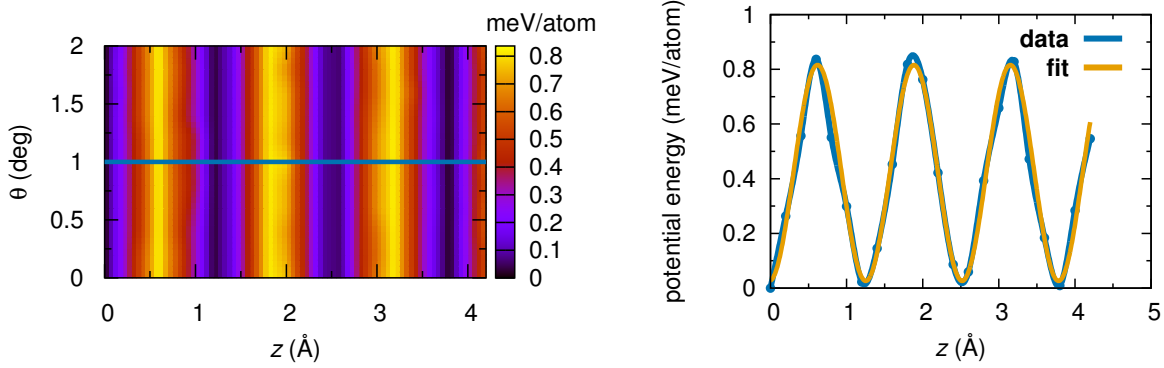

**FIGURE S2:** PES map for the armchair DWBNNT (left) and its corresponding  $E_z$  profile at  $\theta = 1.0^\circ$  (right) alongside a sinusoidal fit. In an idealized case, obtained by assuming an equal force applied to all outer tube atoms and a compensating force to all inner tube atoms, the static friction force  $F_s$  can be estimated from the corrugation energy profile (i.e. the  $E(z)$  at a fixed  $\theta$ ) by dividing the maximum energy excursion by the corrugation periodicity,  $F_s = \pi E_c / \Delta z$ , an approach which is exact in the case of a sinusoidal corrugation profile:  $E(z) = (E_c/2) \sin(2\pi z / \Delta z)$ .

## EFFECT OF PARTIAL CHARGES ON CORRUGATION

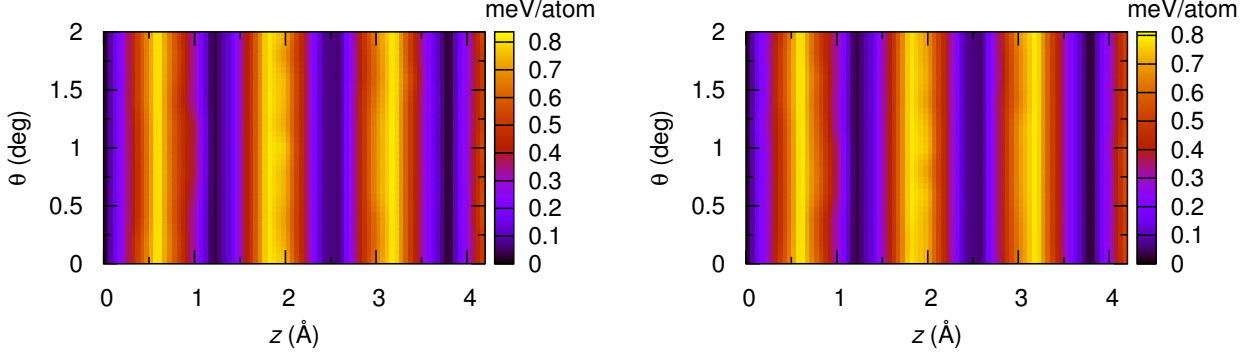

**FIGURE S3:** PES map for the (104,104)@(109,109) armchair DWBNNT, relaxed in the presence (left) of the partial charges on the B ( $q_B = +0.47 e$ ) and N ( $q_N = -0.47 e$ ) atoms, or in their absence (right,  $q_B = q_N = 0$ ). The corrugation energy ( $E_{max} - E_{min}$ ) of 0.84 meV/atom obtained in the charged system reduces to 0.81 meV/atom in the uncharged one.

## CORRUGATION AND ADHESION ENERGY PROFILES

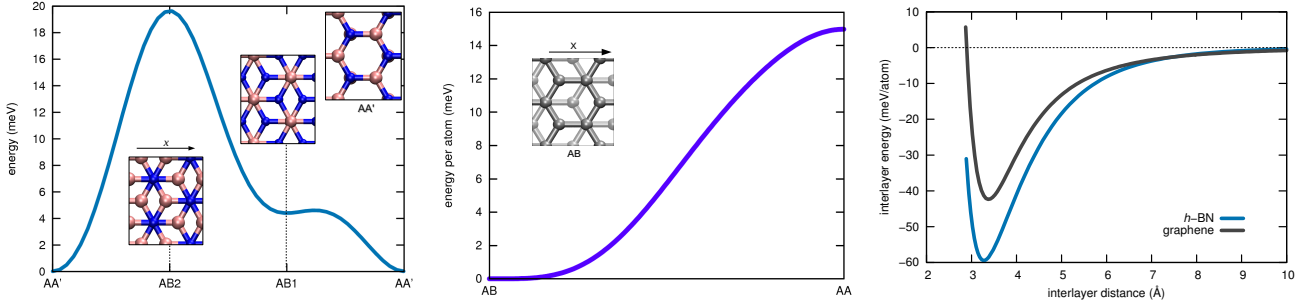

**FIGURE S4:** Potential energy profile for bilayer *h*-BN (left panel) or bilayer graphene (middle panel), calculated by rigidly shifting the top layer along the armchair direction  $x$ . The corresponding binding energy curves, obtained by rigidly shifting the top layer along the vertical direction at the AA' and AB stacking modes for *h*-BN and graphene, respectively, appear in the right panel. The resulting inter-layer binding energy for a graphene bilayer, 42 meV/atom, determined by the Kolmogorov-Krespi RDP1 potential, is comparable with the values reported in literature, ranging from 31 to 52 meV/atom.<sup>1–5</sup> For the *h*-BN bilayer our calculated adhesion energy of 59.4 meV/atom is compatible with *ab initio* DFT+vdW and Quantum Monte Carlo calculations reporting a range of 40.5–76.2 meV/atom.<sup>6–8</sup> Furthermore, our calculated corrugation values and trends are in line with reference values.<sup>8,9</sup> For the sake of clearness we note that the reported per-atom adhesion and corrugation values have been obtained by dividing the total energy by the number of atoms in one layer.

Figure 10 consists of two subplots showing the average friction per atom (nN) versus sliding velocity (m/s) for BNNT and CNT. The left subplot is for Armchair DWNT (104,104)@(109,109) and the right subplot is for Bi-chiral DWNT (70x70)@(77x74). In both cases, BNNT shows a significant increase in friction with velocity, while CNT remains relatively constant and low.

**Left Subplot: Armchair DWNT (104,104)@(109,109)**

| sliding velocity (m/s) | BNNT (nN) | CNT (nN) |
|------------------------|-----------|----------|
| 0.05                   | 13.5      | 3.0      |
| 0.10                   | 14.0      | 3.0      |
| 0.15                   | 15.0      | 3.0      |
| 0.20                   | 16.0      | 3.0      |
| 0.50                   | 20.0      | 3.2      |
| 0.70                   | 22.5      | 3.5      |
| 1.00                   | 26.5      | 3.2      |

**Right Subplot: Bi-chiral DWNT (70x70)@(77x74)**

| sliding velocity (m/s) | BNNT (nN) | CNT (nN) |
|------------------------|-----------|----------|
| 0.05                   | 0.5       | 0.1      |
| 0.10                   | 1.0       | 0.1      |
| 0.15                   | 1.5       | 0.1      |
| 0.20                   | 2.0       | 0.2      |
| 0.50                   | 6.0       | 0.2      |
| 0.70                   | 9.5       | 0.3      |
| 1.00                   | 16.5      | 0.5      |

## STRUCTURAL PROPERTIES FOR THE SET OF CONSIDERED DWNTs

**TABLE S2** – Chiral angle difference ( $\Delta\Theta$ ), average diameter ( $D$ ), interlayer spacing ( $d$ ), and displacement from optimal interlayer spacing ( $d - d_{opt}$ ) of the unrelaxed cylindrical DWNTs considered.

| System | Chiral indices      | $\Delta\Theta$ (deg) | BN       |          |                    | C        |          |                    |
|--------|---------------------|----------------------|----------|----------|--------------------|----------|----------|--------------------|
|        |                     |                      | $D$ (nm) | $d$ (nm) | $d - d_{opt}$ (nm) | $D$ (nm) | $d$ (nm) | $d - d_{opt}$ (nm) |
| AC@AC  | (104,104)@(109,109) | 0.0                  | 15.0     | 0.344    | 0.017              | 15.0     | 0.344    | 0.007              |
| ZZ@ZZ  | (180,0)@(188,0)     | 0.0                  | 14.9     | 0.318    | -0.009             | 14.9     | 0.318    | -0.019             |
| AC@Ch  | (70,70)@(77x74)     | 0.657                | 10.4     | 0.378    | 0.051              | 10.4     | 0.378    | 0.041              |
| ZZ@AC  | (179,0)@(108,108)   | 30.0                 | 14.9     | 0.321    | -0.006             | 14.9     | 0.321    | -0.016             |

## MOVIE CAPTIONS

**MOVIE 1:** Cross sectional view of armchair (top panels) and Zigzag (bottom panels) DWNTs for BN (left panels) and carbon (right panels), relaxed at different relative axial positions  $z$ . Atoms are colored as a function of the inter-layer potential energy.

**MOVIE 2:** Cross sectional view of the armchair DWBNNT relaxed at different relative axial positions  $z$  (left) and dynamically driven at relative pulling velocity  $v_z = 0.01 \text{ \AA/ps}$  (right). Atoms are colored as a function of the inter-layer potential energy.

**MOVIE 3:** Dynamical view of the bi-chiral DWBNNT at relative pulling velocity  $v_z = 0.01 \text{ \AA/ps}$ . Atoms are colored as a function of the inter-layer potential energy.

**MOVIE 4:** Dynamical view of the bi-chiral DWCNT at relative pulling velocity  $v_z = 0.01 \text{ \AA/ps}$ . Atoms are colored as a function of the inter-layer potential energy.

- 
- <sup>1</sup> Girifalco, L. A.; Lad, R. A. *J. Chem. Phys.* **1956**, *25*, 693.  
<sup>2</sup> Benedict, L. X.; Chopra, N. G.; Cohen, M. L.; Zettl, A.; Louie, S. G.; Crespi, V. H. *Chem. Phys. Lett.* **1998**, *286*, 490.  
<sup>3</sup> Zacharia, R.; Ulbricht, H.; Hertel, T. *Phys. Rev. B* **2004**, *69*, 155406.  
<sup>4</sup> Liu, Z.; Liu, J. Z.; Cheng, Y.; Li, Z.; Wang, L.; Zheng, Q. *Phys. Rev. B* **2012**, *85*, 205418.  
<sup>5</sup> Wang, W.; Dai, S.; Li, X.; Yang, J.; Srolovitz, D. J.; Zheng, Q. *Nature Communications* **2015**, *6*, 7853.  
<sup>6</sup> Marom, N.; Bernstein, J.; Garel, J.; Tkatchenko, A.; Joselevich, E.; Kronik, L.; Hod, O. *Phys. Rev. Lett.* **2010**, *105*, 046801.  
<sup>7</sup> Hsing, C-R; Cheng, C.; Chou, J-P; Chang, C-M; Wei, C-M. *New Journal of Physics* **2014**, *16*, 113015.  
<sup>8</sup> Lebedev, A. V.; Lebedeva, I. V.; Knizhnik, A. A.; Popov, A. M. *RSC Adv.* **2016**, *6*, 6243.  
<sup>9</sup> Kolmogorov, A. N.; Crespi, V. H. *Phys. Rev. B* **2005**, *71*, 235415.  
<sup>10</sup> Niguès, A.; Siria, A.; Vincent, P.; Poncharal, P.; Bocquet, L. *Nature Materials* **2014**, *13*, 688.
